# Supplementary material
Source: PubMed Central journal article supplement (PMC2944046)
Supplement: emboj2010158s1.pdf [file emboj2010158s1.pdf]

## Supplementary Information

### Kinase Assay

For the kinase assay, a stationary phase culture of strain 774 (HA-HGC1 pMET3-cdc28-1as) was washed in distilled water and diluted 1:20 in 500mls pre-warmed YEPD, pH 7.0 plus 20% v/v fetal calf serum and incubated at 37°C for 120 minutes. In these conditions, Western blots using an anti-PSTAIRE monoclonal antibody (Roche) showed that Cdc28 was expressed physiological levels from the MET3 promoter (data not shown). Cells harvested as rapidly as possible by dividing the culture into 50ml Falcon tubes and spinning for one minute in an Accuspin 1™ bench top centrifuge (Fisher Scientific, Loughborough, UK) at 3000 rpm. The pellet in each Falcon tube was resuspended in 1ml of ice-cold modified RIPA buffer and transferred to a pre-chilled microfuge tube. Modified RIPA buffer consists of 50mM Tris HCl pH 7.2, 0.1% sodium deoxycholate, 0.1% Triton X-100, 50mM sodium fluoride, 0.2 mM Sodium orthophosphate, 0.2mM  $\beta$ -glycerol phosphate and 2x complete protease inhibitor cocktail (Roche). The cells in each microfuge tube were centrifuged for 10 seconds in a microfuge and the pellet in each tube resuspended in 0.2 mls ice-cold modified RIPA buffer. The cell suspension was mixed with an equal volume of pre-chilled glass beads and the cells disrupted using a FastPrep beadbeater fitted with cryohead (MP Bio, Cambridge, UK). The lysate was cleared by centrifugation in a microfuge at 13,000 for 15 mins at 4°C and the supernatants from the 10 microfuge tubes combined. To purify the HA-Hgc1 fusion protein 20mgs of total cell protein in 2mls lysate was incubated with for 1h with 5 $\mu$ g of anti-HA monoclonal antibody or anti-GFP antibody (mock lysate) at 4°C, then 50 $\mu$ l of protein G sephadex beads were added and the incubation continued for a further hour. The beads were collected by centrifugation and washed 3x with ice-cold modified RIPA buffer + 500mM NaCl and 1x kinase reaction buffer (25mM Tris HCl pH 7.5, 5 mM  $\beta$ -glycerol phosphate, 15 mM magnesium Chloride, 100 $\mu$ M ATP). Finally, the beads were

resuspended in 50µl kinase reaction buffer to which 75µl glycerol was added and the beads stored at -80°C. To generate the peptides used as substrates for the kinase assay, DNA sequences were amplified by PCR from pFA plasmids carrying the wild type Sec2 sequence or the phosphomimetic allele at S584. These sequences were cloned into pGEX-6P-1 GST expression plasmid (GE Health Care) and the cloned insert sequenced. The GST-peptide fusion proteins were expressed and purified using the GST fusion kit (GE Health Care) according the manufacturer's instructions.

Cdc28 kinase activity was measured as follows. Immunoprecipitates were washed into 10 µl of EB buffer (80mM sodium β-glycerophosphate, 10mM MgCl<sub>2</sub> 5mM EGTA), and the reaction initiated by addition to an equal volume of reaction mixture containing 1-5µg of indicated substrate polypeptide in 40mM HEPES pH 7.7, 200µM ATP, 37kBq γ-labelled <sup>32</sup>P-ATP +/- 25 µM 1NM-PP1 inhibitor (or equal volume of DMSO) for 60 minutes at 30°C. Reactions were halted by addition of Laemmli buffer and reaction mixtures subjected to SDS-PAGE on 4-20% gradient gels (Thermo Fisher Scientific, MA, USA). Gels were Coomassie stained and dried down before exposure to Hyperfilm-MP (GE Healthcare, WI, USA). Autoradiographs images were acquired and image intensities quantified using ImageJ.

**Figure S1. Confirmation that *cdc28Δ/cdc28-1as sec2Δ/Sec2 584E* strain carries only the analogue-sensitive F85G allele.** After the experiments described in this paper were completed, the region surrounding the sequence that encodes the F85G allele was amplified by PCR (primers specified in supplementary table 2) and re-sequenced. The highlighted triplet GGT completely replaces TTT in the wild type sequence.

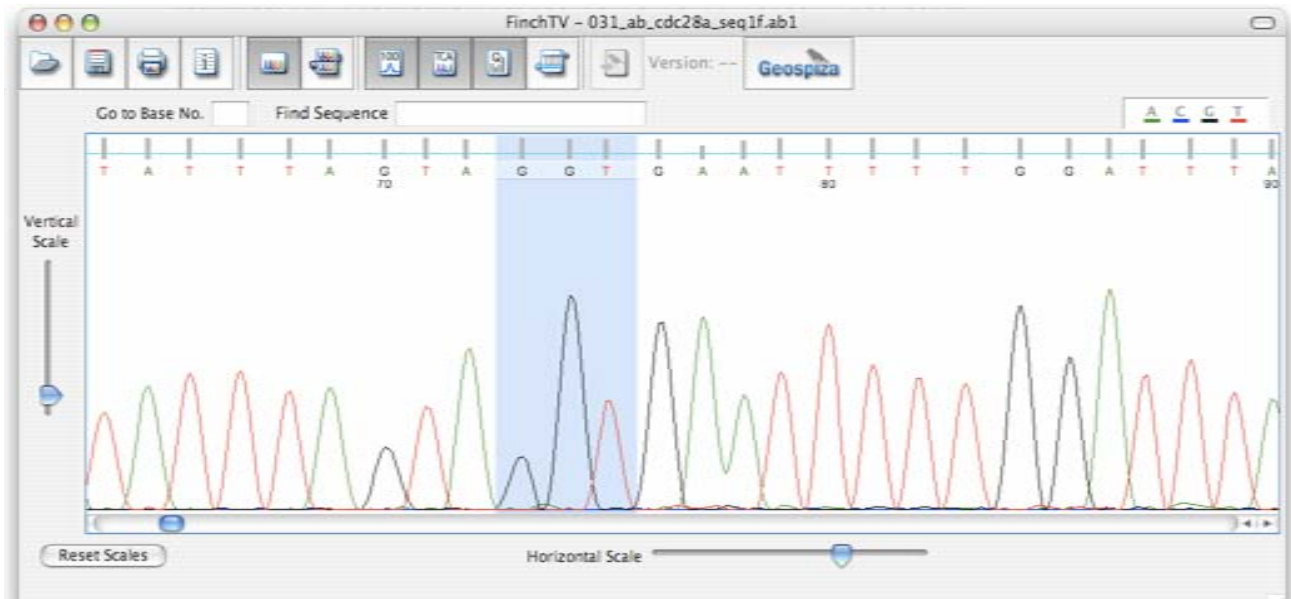

Figure S1

**Table S1. Strains used in this study**

| Sheffield Strain number | Relevant Genotype             | Full Genotype                                                                            | Source                       |
|-------------------------|-------------------------------|------------------------------------------------------------------------------------------|------------------------------|
| 305                     | BWP17                         | <i>ura3::λimm434/ura3::λimm434</i><br><i>his1::hisG/his1::hisG arg4::hisG/arg4::hisG</i> | Wilson <i>et al.</i> , 1999  |
| 301                     | CAI4                          | <i>ura3::λimm434/ura3::λimm434</i>                                                       | Fonzi and Irwin, 1993        |
| 1106                    | <i>CCNI-GFP/SEC2-FLAG</i>     | BWP17 <i>Sec2-FLAG-ARG4/CCNI-GFP:URA4</i>                                                | This Study                   |
| 755                     | <i>hgc1Δ/Δ</i>                | BWP17 <i>hgc1::HIS1/hgc1::ARG4</i>                                                       | Zheng <i>et al.</i> , (2004) |
| 1107                    | <i>hgc1Δ/Δ/SEC2-YFP</i>       | BWP17 <i>hgc1::HIS1/hgc1::ARG4/SEC2-YFP:URA3</i>                                         | This Study                   |
| 757                     | <i>ccn1Δ/Δ</i>                | CAI4 <i>ccn1::hisG/ccn1::hisG</i>                                                        | Loeb <i>et al.</i> , 1999    |
| 1109                    | <i>ccn1Δ/Δ/SEC2-YFP</i>       | CAI4 <i>ccn1::hisG/ccn1::hisG/SEC2-YFP:URA3</i>                                          | This Study                   |
| 1110                    | <i>HGCI-GFP/SEC2-FLAG</i>     | BWP17 <i>HGCI-GFP-URA3/SEC2-FLAG:ARG4</i>                                                | This Study                   |
| 1111                    | <i>HGCI-GFP</i>               | BWP17 <i>HGCI-GFP:URA3</i>                                                               | This Study                   |
| 1112                    | <i>cdc28-1as/Δ/SEC2-S584E</i> | BWP17 <i>CDC28-1as:URA3/cdc28::HIS1/Sec2-S584E:ARG4</i>                                  | This Study                   |

|      |                                      |                                                                           |                       |
|------|--------------------------------------|---------------------------------------------------------------------------|-----------------------|
| 1117 | <i>sec2Δ/ SEC2-S601A-(1-607)-YFP</i> | BWP17 <i>sec2::HIS1/ SEC2-(1-607)-S601A-YFP:URA3</i>                      | This Study            |
| 1124 | <i>SEC2-FLAG</i>                     | BWP17 <i>SEC2-FLAG:ARG4</i>                                               | This Study            |
| 1127 | <i>cbk1Δ/ CBK1-S570A/ SEC2-YFP</i>   | BWP17 <i>cbk1::HIS1/ CBK1-S570A:ARG4/ SEC2YFP:URA3</i>                    | This Study            |
| 1134 | <i>hgc1Δ/Δ/ SEC2-S584E</i>           | BWP17 <i>hgc1::ARG4/ hgc1::HIS1/ SEC2-S584E:URA3</i>                      | This Study            |
| 1138 | <i>ccn1Δ/Δ/ SEC2-S584E</i>           | BWP17 <i>ccn1::ARG4/ ccn1::HIS1/ SEC2-S584E:URA3</i>                      | This Study            |
| 1143 | <i>CDC28-1as/Δ/ SEC2YFP</i>          | BWP17 <i>CDC28-1as:URA3/ cdc28::HIS1/ SEC2-YFP:HIS</i>                    | This Study            |
| 774  | <i>6HA-HGC1 CDC28-1as/Δ</i>          | <i>Cdc28Δ::ARG4/pMET3-cdc28as-URA3 HGC1/6HA-HGC1-HIS1</i>                 | Zheng., et al<br>2007 |
| 1144 | <i>efg1Δ/Δ/ cph1Δ/Δ</i>              | <i>CAI4 efg1::hisG/ efg1::hisG/ cph1::hisG/ cph1::hisG</i>                | Lo et al.,<br>1997    |
| 1153 | <i>efg1Δ/Δ/ cph1Δ/Δ/ SEC2-YFP</i>    | <i>CAI4 efg1::hisG/ efg1::hisG/ cph1::hisG/ cph1::hisG/ Sec2-YFP:URA3</i> | This Study            |
| 1154 | <i>pMET3-YFP-SEC2-S584E/ sec2Δ</i>   | BWP17 <i>URA3:pMET3-YFP-SEC2-S584E:ARG4/ sec2::HIS1</i>                   | This Study            |
| 1156 | <i>pMET3-YFP-SEC2-S645E/ sec2Δ</i>   | BWP17 <i>URA3:pMET3-YFP-SEC2-S645E:ARG4/ sec2::HIS1</i>                   | This Study            |

|      |                                    |                                                        |            |
|------|------------------------------------|--------------------------------------------------------|------------|
| 1158 | <i>pMET3-YFP-SEC2-T493A/ sec2Δ</i> | BWP17 <i>URA3:pMET3-YFP-SEC2-T493A:ARG4/sec2::HIS1</i> | This Study |
| 810  | <i>sec2Δ</i>                       | BWP17 <i>SEC2/sec2::HIS1</i>                           | This Study |
| 813  | <i>SEC2-YFP/sec2Δ</i>              | BWP17 <i>SEC2-YFP:URA3/sec2::HIS1</i>                  | This Study |
| 820  | <i>SEC2(1-450)-YFP</i>             | BWP17 <i>SEC2/SEC2(1-450)-YFP:URA3</i>                 | This Study |
| 845  | <i>SEC2(1-492)-YFP</i>             | BWP17 <i>SEC2/SEC2(1-492)-YFP :URA3</i>                | This Study |
| 818  | <i>SEC2(1-508)-YFP</i>             | BWP17 <i>SEC2/SEC2(1-508)-YFP:URA3</i>                 | This Study |
| 821  | <i>SEC2(1-541)-YFP</i>             | BWP17 <i>SEC2/SEC2(1-541)-YFP:URA3</i>                 | This Study |
| 826  | <i>SEC2(1-550)-YFP/sec2Δ</i>       | BWP17 <i>SEC2(1-550)-YFP:URA3/sec2::HIS1</i>           | This Study |
| 837  | <i>SEC2(1-583)-YFP/sec2Δ</i>       | BWP17 <i>SEC2(1-583)-YFP:URA3/sec2::HIS1</i>           | This Study |
| 1132 | <i>SEC2(1-591)-YFP/sec2Δ</i>       | BWP17 <i>SEC2(1-591)-YFP:URA3/sec2::HIS1</i>           | This Study |
| 1163 | <i>SEC2(1-597)-YFP/sec2Δ</i>       | BWP17 <i>SEC2(1-597)-YFP :URA3/sec2 ::HIS1</i>         | This Study |
| 1133 | <i>SEC2(1-607)-YFP/sec2Δ</i>       | BWP17 <i>SEC2(1-607)-YFP:URA3/sec2::HIS1</i>           | This Study |
| 1139 | <i>SEC2(1-625)-YFP/sec2Δ</i>       | BWP17 <i>SEC2(1-625)-YFP/sec2::HIS1</i>                | This Study |
| 1113 | <i>sec2Δ/SEC2<sup>584E</sup></i>   | BWP17 <i>sec2::HIS1/SEC2<sup>584E</sup>:ARG4</i>       | This Study |
| 855  | <i>sec2Δ/SEC2<sup>588A</sup></i>   | BWP17 <i>sec2::HIS1/SEC2<sup>588A</sup>:ARG4</i>       | This Study |
| 850  | <i>sec2Δ/SEC2<sup>645A</sup></i>   | BWP17 <i>sec2::HIS1/SEC2<sup>645A</sup>:ARG4</i>       | This Study |
| 861  | <i>sec2Δ/SEC2<sup>645E</sup></i>   | BWP17 <i>sec2::HIS1/SEC2<sup>645E</sup>:ARG4</i>       | This Study |

|      |                                             |                                                             |            |
|------|---------------------------------------------|-------------------------------------------------------------|------------|
| 1183 | <i>SEC2<sup>598A</sup>(1-607)-YFP/sec2Δ</i> | BWP17 <i>SEC2<sup>598A</sup>(1-607)-YFP:URA3/sec2::HIS1</i> | This Study |
| 1182 | <i>SEC2<sup>600E</sup>(1-607)-YFP/sec2Δ</i> | BWP17 <i>SEC2<sup>600E</sup>(1-607)-YFP:URA3/sec2::HIS1</i> | This Study |
| 1161 | <i>SEC2<sup>601A</sup>(1-607)-YFP/sec2Δ</i> | BWP17 <i>SEC2<sup>601A</sup>(1-607)-YFP:URA3/sec2::HIS1</i> | This Study |
| 1178 | <i>SEC2-GFP/EXO70-YFP</i>                   | BWP17 <i>SEC2-GFP:ARG4/EXO70-YFP:URA3</i>                   | This Study |

**Table S2. Oligonucleotides used in this study**

| Primer                       | Description                                            | Sequence                                                                                                              |
|------------------------------|--------------------------------------------------------|-----------------------------------------------------------------------------------------------------------------------|
| <i>SEC2</i> YUF              | 5' primer for C-terminal tagging of <i>SEC2</i>        | ACAAACTTTAGAGATGTTAGCCGAAAATATTGATT<br>TTGATGAGAGTAGTAATGGTAATGGTAATGGTAAT<br>GGTGGTGGTTCTAAAGGTGAAGAATTATT           |
| <i>SEC2</i> YUR              | 3' primer for C-terminal tagging of <i>SEC2</i>        | TATTGATTTGTA CTGTACCAATCACATTTGACTTG<br>T<br>GTATTATATAATTCAACTCAAATCACTAATCTGTCT<br>AGAAGGACCACCTTTGATTG             |
| <i>SEC2</i> TRUNC<br>F CHECK | Internal checking primer in 3' region of <i>SEC2</i>   | TCTTTACCTGCTACCACGAC                                                                                                  |
| <i>SEC2</i> (1-450)<br>YUF   | 5' primer for C terminal truncation via <i>YFP</i> tag | GATTTCCTTTGCCAAAATCAGATTGATAAGATCCAA<br>T<br>ATTTTAAATTAAAACAAAATGATTCTTTTGATGA<br>A<br>GGTGGTGGTTCTAAAGGTGAAGAATTATT |



|                    |                                                              |                                                                                                                           |
|--------------------|--------------------------------------------------------------|---------------------------------------------------------------------------------------------------------------------------|
|                    |                                                              |                                                                                                                           |
| SEC2(1-492)<br>YUF | 5' primer for C<br>terminal truncation<br>via <i>YFP</i> tag | AATAGAAATGGGACGTATTCTTCATCGTCAACATC<br>A<br>TCATCCTCGACTTCTTCGGTATCTTCATCGTCTGCT<br><br>GGTGGTGGTTCTAAAGGTGAAGAATTATT     |
| SEC2(1-508)<br>YUF | 5' primer for C<br>terminal truncation<br>via <i>YFP</i> tag | TCTTCGGTATCTTCATCGTCTGCTACAACACTGCAAAT<br>GGTGAATCATTAAACAGTACAACACTCATAACATTCA<br>A<br><br>GGTGGTGGTTCTAAAGGTGAAGAATTATT |
| SEC2(1-541)<br>YUF | 5' primer for C<br>terminal truncation<br>via <i>YFP</i> tag | AAGTTATATATAATGATGTTATTGATTTCGATCAAA<br>G<br>ATTTTTTGGAGTAAATTAGGATTTTGGGATACT<br><br>GGTGGTGGTTCTAAAGGTGAAGAATTATT       |
| SEC2(1-550)<br>YUF | 5' primer for C<br>terminal truncation<br>via <i>YFP</i> tag | ATTCGATCAAAGATTTTTTGGAGTAAATTAGGATT<br>T<br>TGGGATACTATTGATCAAATTAATGAGATTAATTT<br>A<br><br>GGTGGTGGTTCTAAAGGTGAAGAATTATT |

|                    |                                                              |                                                                                                                              |
|--------------------|--------------------------------------------------------------|------------------------------------------------------------------------------------------------------------------------------|
|                    |                                                              |                                                                                                                              |
| SEC2(1-583)<br>YUF | 5' primer for C<br>terminal truncation<br>via <i>YFP</i> tag | TATTTAATACCTAAACCAACCCAACAACAACAGCA<br>A<br>CAACAAGGAGATATACGTAGCCAATCAAATTTCAA<br>T<br>GGTGGTGGTTCTAAAGGTGAAGAATTATT        |
| SEC2(1-591)<br>YUF | 5' primer for C<br>terminal truncation<br>via <i>YFP</i> tag | ACCCAACAACAACAGCAACAACAAGGAGATATAC<br>GTAGC<br>CAATCAAATTTCAATTCACCCAGACAACCTGGTAGA<br>T<br>GGTGGTGGTGGTTCTAAAGGTGAAGAATTATT |
| SEC2(1-597)<br>YUF | 5' primer for C<br>terminal truncation<br>via <i>YFP</i> tag | GGAGATATACGTAGCCAATCAAATTTCAATTCACC<br>CAGA<br>CAACTGGTAGATGGTAGATCAGTGCTAAGCGGTGG<br>TGGT<br>GGTTCTAAAGGTGAAGAATTATT        |

|                                |                                                              |                                                                                                                       |
|--------------------------------|--------------------------------------------------------------|-----------------------------------------------------------------------------------------------------------------------|
| SEC2(1-607)<br>YUF             | 5' primer for C<br>terminal truncation<br>via <i>YFP</i> tag | AGCCAATCAAATTTCAATTCACCCAGACAACTGGT<br>AGAT<br>GGTAGATCAGTGCTAAGCGGTAGTATTAGTTCTGG<br>TGGT<br>GGTTCTAAAGGTGAAGAATTATT |
| SEC2(1-625)<br>YUF             | 5' primer for C<br>terminal truncation<br>via <i>YFP</i> tag | CAACCAAATCTCGACAAACAACAAAAGGACTCTA<br>TT<br>GTGGATGAGACAGTAGCACAATTACAAAGAGGT<br>GGTGGTTCTAAAGGTGAAGAATTATT           |
| SEC2 C-<br>TERMINUS F<br>CHECK | Internal C-terminal<br>f checking primer                     | ACAAGGAGATATACGTAGCC                                                                                                  |
| SEC2 C-<br>TERMINUS<br>R CHECK | Internal C-terminal<br>r check                               | CCATTACCATTACTACTCTC                                                                                                  |
| SEC2::HIS1 F                   | 5' primer for<br>disruption of <i>SEC2</i>                   | ATATATCAACTGATTCACAAAGTACTGATCAGTTG<br>T<br>TGTTTTTTGAGTGATTATTATATATTTGATTGG                                         |

|                               |                                                                          |                                                                                                                                    |
|-------------------------------|--------------------------------------------------------------------------|------------------------------------------------------------------------------------------------------------------------------------|
|                               |                                                                          | GTTTTCCCAGTCACGACGTT                                                                                                               |
| <i>SEC2</i> ::HIS R           | 3' primer for<br>disruption of <i>SEC2</i>                               | TATTGATTTGTA<br>ACTTGTACCAAT<br>CACATTTGACTT<br>G<br><br>GTATTATATAAT<br>TCAACTCAAATC<br>ACTAATCTG<br><br>TGTGGAATTGT<br>GAGCGGATA |
| <i>SEC2</i> ::HIS1 F<br>CHECK | 5' primer for<br>checking disruption<br>of <i>SEC2</i>                   | ATTTGCTCCAAC<br>AGACATCCA                                                                                                          |
| <i>SEC2</i> F1                | 5' primer for<br>cloning <i>SEC2</i> into<br>pfa arg4 for<br>mutagenesis | GGATCCGTCGTT<br>CCTGGTAGTTTT<br>GG                                                                                                 |
| <i>SEC2</i> R1                | 3' primer for<br>cloning <i>SEC2</i> into<br>pfa arg4 for<br>mutagenesis | CCTAGGCCAAT<br>CACATTTGACTT<br>GTG                                                                                                 |
| <i>SEC2</i> F2<br>(T493A)     | 5' mutagenesis<br>primer                                                 | GTATCTTCATCG<br>TCTGCTGCAACT<br>GCAAATGGTGA<br><br>ATCA                                                                            |
| <i>SEC2</i> R2<br>(T493A)     | 3' mutagenesis<br>primer                                                 | GATTCACCATT<br>TGCAGCTGTAG<br>CAGACGATGAAG<br>A<br><br>ATACG                                                                       |
| <i>SEC2</i> F2<br>(T494A)     | 5' mutagenesis<br>primer                                                 | CGTATTCTTCAT<br>CGTCTGCTACAG<br>CTGCAAATGGT<br><br>GAATC                                                                           |

|                                      |                          |                                                                        |
|--------------------------------------|--------------------------|------------------------------------------------------------------------|
| <i>SEC2R2</i><br>(T494A)             | 3' mutagenesis<br>primer | GATTCACCATTTGCAGCTGTAGCAGACGATGAAGA<br>ATACG                           |
| <i>SEC2F2</i><br>(T494E)             | 5' mutagenesis<br>primer | CTTCTTCGGTATCTTCATCGTCTGCTGAGACTGCAA<br>ATGGTGAATCATTA AAC             |
| <i>SEC2R2</i><br>(T494E)             | 3' mutagenesis<br>primer | GAAGAAGCCATAGAAGTAGCAGACGACTCTGACG<br>TTTACCACTTAGTAATTTG              |
| <i>SEC2F2</i><br>(S515A)             | 5' mutagenesis<br>primer | CTCATAACATTCAATTAGAAAGAACAGAAGAGGC<br>TAAATTGATCAAGTTATATATAATGATGTTAT |
| <i>SEC2R2</i><br>(S515A)             | 3' mutagenesis<br>primer | ATAACATCATTATATATAACTTGATCAATTTAGCCT<br>CTTCTGTTCTTTCTAATTGAATGTTATGAG |
| <i>SEC2F2</i><br><i>SEC2</i> (Y521A) | 5' mutagenesis<br>primer | AAGAACAGAAGAGAGTAAATTGATCAAGTTAGCT<br>ATAATGATGTTATTGATTCGATCAAAGATT   |
| <i>SEC2R2</i><br>(Y521A)             | 3' mutagenesis<br>primer | AATCTTTGATCGAATCAATAACATCATTATAGCTA<br>ACTTGATCAATTTACTCTCTTCTGTTCTT   |
| <i>SEC2F2</i><br>(S534A)             | 5' mutagenesis<br>primer | TGTTATTGATTCGATCAAAGATTTTTTGGGCTAAAT<br>TAGGATTTTGGGATACTATTGATC       |

|                          |                          |                                                                 |
|--------------------------|--------------------------|-----------------------------------------------------------------|
|                          |                          |                                                                 |
| <i>SEC2R2</i><br>(S534A) | 3' mutagenesis<br>primer | GATCAATAGTATCCCAAATCCTAATTTAGCCCAA<br>AAAATCTTTGATCGAATCAATAACA |
| <i>SEC2</i><br>(S484A) F | 5' mutagenesis<br>primer | CATCATCATCCTCGACTTCTGCGGTATCTTCATCGT                            |
| <i>SEC2</i><br>(S484A) R | 3' mutagenesis<br>primer | ACGATGAAGATACCGCAGAAGTCGAGGATGATGA<br>TG                        |
| <i>SEC2</i> (S484E)<br>F | 5' mutagenesis<br>primer | AACATCATCATCCTCGACTTCTGAGGTATCTTCATC<br>GTCTGC                  |
| <i>SEC2</i> (S484E)<br>R | 3' mutagenesis<br>primer | GCAGACGATGAAGATACCTCAGAAGTCGAGGATG<br>ATGATGTT                  |
| <i>SEC2</i><br>(S584A) F | 5' mutagenesis<br>primer | AGATATACGTAGCCAATCAAATTTCAATGCACCCA<br>GACAACCTGG               |
| <i>SEC2</i><br>(S584A) R | 3' mutagenesis<br>primer | CCAGTTGTCTGGGTGCATTGAAATTTGATTGGCTA<br>CGTATATCT                |

|                                 |                          |                                                                         |
|---------------------------------|--------------------------|-------------------------------------------------------------------------|
|                                 |                          |                                                                         |
| <i>SEC2</i> (S584E)<br>F        | 5' mutagenesis<br>primer | CAAGGAGATATACGTAGCCAATCAAATTTCAATGA<br>GCCCAGACAACCTGGTAGA              |
| <i>SEC2</i> (S584E)<br>R        | 3' mutagenesis<br>primer | TCTACCAGTTGTCTGGGCTCATTGAAATTTGATTGG<br>CTACGT<br><br>ATATCTCCTTG       |
| <i>SEC2</i><br>(S588A) F        | 5' mutagenesis<br>primer | CAAATTTCAATTCACCCAGACAAGCGGTAGATGGT<br>AGATCAGTGC                       |
| <i>SEC2</i><br>(S588A) R        | 3' mutagenesis<br>primer | GCACTGATCTACCATCTACCGCTTGTCTGGGTGAA<br>TTGAAATTTG                       |
| <i>SEC2</i> (S588E)<br>F        | 5' mutagenesis<br>primer | CAAATTTCAATTCACCCAGACAAGAGGTAGATGGT<br>AGATCAGTGC                       |
| <i>SEC2</i> (S588E)<br>R        | 3' mutagenesis<br>primer | GCACTGATCTACCATCTACCTCTTGTCTGGGTGAAT<br>TGAAATTTG                       |
| <i>SEC2</i><br>(S588+584A)<br>F | 5' mutagenesis<br>primer | CAAGGAGATATACGTAGCCAATCAAATTTCAATGA<br>GCCCAGACAAGAGGTAGATGGTAGATCAGTGC |

|                                 |                                                                |                                                                                                     |
|---------------------------------|----------------------------------------------------------------|-----------------------------------------------------------------------------------------------------|
|                                 |                                                                |                                                                                                     |
| <i>SEC2</i><br>(S588+584A)<br>R | 3' mutagenesis<br>primer                                       | GCACTGATCTACCATCTACCTCTTGTCTGGGCTCAT<br>TGAAATTTGATTGGCTACGTATATCTCCTTG                             |
| PFA-ARG4-<br>REV                | 3' primer for<br>checking<br>integration of <i>arg4</i>        | TACACGACCCACAGTTAGTC                                                                                |
| SEC2-DNS-<br>REV                | 3' primer for<br>checking<br>mutagenesis of<br><i>SEC2</i>     | TAGTAGATACGTATCATAT                                                                                 |
| URA3-MET3-<br>YFP-SEC2-F        | 5' primer for n<br>terminal <i>YFP</i> tag                     | TTAGAATACTTTTTCAGAACTTTTCAGATTAATCA<br>ATTTAATTCAGTTATTGCTCCAACCAACATAAATCT<br>AGAAGGACCACCTTTGATTG |
| URA3-MET3-<br>YFP-SEC2-R        | 5' primer for n<br>terminal <i>YFP</i> tag                     | TGTA ACTAATCGTGTGCGATAAACTGCCAACTTCTT<br>CTGCCAATCTTTTATCATAATCGGCTTGTGATGATT<br>TGTACAATTCATCCATAC |
| RC8                             | 5' primer to<br>confirm integration<br>of <i>ura3-met3-YFP</i> | TATGCGATTGTGGCTACTAGTAACG                                                                           |
| SEC2(1-607,<br>S601A)YUF        | 5' primer for C<br>terminal truncation                         | AGACAACTGGTAGATGGTAGATCAGTGCTAAGCG<br>GTAGTATTAGTGCTCCAAGACAACCAAATCTCGGT                           |



|                                    |                                                                                 |                                                                                                         |
|------------------------------------|---------------------------------------------------------------------------------|---------------------------------------------------------------------------------------------------------|
|                                    | and mutagenesis<br>via <i>YFP</i> tag                                           | GGTGGTTCTAAAGGTGAAGAATTATT                                                                              |
| SEC2(1- 607,<br>S598A,S600A<br>YUF | 5' primer for C<br>terminal truncation<br>and mutagenesis<br>via <i>YFP</i> tag | AGACAACTGGTAGATGGTAGATCAGTGCTAAGCG<br>GTGCAATTGCATCTCCAAGACAACCAAATCTCGGT<br>GGTGGTTCTAAAGGTGAAGAATTATT |
| C28FCL                             | 5' primer for<br>cloning <i>CDC28</i><br>into pfa-ura3 for<br>mutagenesis       | CCCAAGCTTACCAAGCACAATAATAGAGT                                                                           |
| C28RCL                             | 3' primer for<br>cloning <i>CDC28</i><br>into pfa-ura3 for<br>mutagenesis       | GAACTGCAGGGTTATTATGTTTCATATGCC                                                                          |
| C28DF                              | 5' deletion primer                                                              | ATGTTTACTAACCAACTATAGAACACACACATCCC<br>AAGCCAAGACCAACACTTATTGCAAGTTTTCCCAG<br>TCACGACGTT                |
| C28DR                              | 3' deletion primer                                                              | TTGATTTTTTTTCCGTTTTTTCTTTTCGATGTCGATA<br>TTTTATTGAGGAGGCGACAAGATTGTGGAATTGTG<br>AGCGGATA                |
| CDC28 UF                           | 5' integration<br>primer                                                        | ACCAAGCACAATAATAGAGTTGTTGCATTAAAGAA<br>AATTCGATTAGAATCAGAAGATGAAGGTGTACCTA<br>GTACCGCCATTAGA            |

|                 |                                                        |                                                                                                                               |
|-----------------|--------------------------------------------------------|-------------------------------------------------------------------------------------------------------------------------------|
| CDC28 UR        | 3' integration<br>primer                               | GATAATATTCATCTTTTCCATTATAAGAAGAGTAT<br>GAACCATACCCTTCTGAACCGTTTGTCTGATATCAT<br>CGATGAATTCGAG                                  |
| CDC28 F85G<br>F | 5' mutagenesis<br>primer                               | TAAATTATATTTAGTAGGTGAATTTTGGATTTAG                                                                                            |
| CDC28<br>F85GR  | 3' mutagenesis<br>primer                               | CTAAATCCAAAAATTCACCTACTAAATATAATTTA                                                                                           |
| CDC28-EF        | 5' primer for<br>amplification of<br><i>CDC28</i>      | AGTGGTAGTGGAAGTGGTTG                                                                                                          |
| CDC28-<br>SEQ2R | 3' primer for<br>amplification of<br><i>CDC28</i>      | CGATATTTTATTGAGGAGGC                                                                                                          |
| CDC28-<br>SEQ3R | 5' primer for<br>sequencing <i>CDC28</i>               | AGATTTTCGGGAGCTCGATAC                                                                                                         |
| CDC28-<br>SEQ1F | 3' primer for<br>sequencing <i>CDC28</i>               | ACCTAGTACCGCCATTAGAG                                                                                                          |
| SEC2-FLAG-<br>F | 5' primer for C-<br>terminal tagging of<br><i>SEC2</i> | ATGTTAGCCGAAAATATTGATTTTGATGAGAGTAG<br>TAATGGTAATGGTAATGGTAATGCAGGCGGAGATT<br>ATAAAGATGACGATGACAAATAAGGTTTCCCAGTC<br>ACGACGTT |

|                 |                                                 |                                                                                                        |
|-----------------|-------------------------------------------------|--------------------------------------------------------------------------------------------------------|
| SEC2-FLAG-R     | 3' primer for C-terminal tagging of <i>SEC2</i> | TACTTGTACCAATCACATTTGACTTGTGTATTATAT<br>AATTCAACTCAAATCACTAATCTGTGGAATTGT<br>GAGCGGATA                 |
| CCN1-GFP-S1     | 5' primer for C-terminal tagging of <i>ccn1</i> | AATGAATCAACAACAACAACAAGTGACCCAA<br>TCATCATTATATCAACATCATCATCAATATCATCA<br>Aggtgctggcgcaggtgcttc        |
| CCN1-GFP-S2     | 3' primer for C-terminal tagging of <i>ccn1</i> | ATTATCAAATTAATCAAATCAAGCAAATAAACAAA<br>CAAACAAAGCATTATAAATTAAGTGTATGGTTA<br>tctgatatcatcgatgaattcgag   |
| CCN1GFP-CHECK-F | internal C-terminal f checking primer           | GTATTGGTAGTAATAGTAGT                                                                                   |
| HGC1-GFP-S1     | 5' primer for C-terminal tagging of <i>hgc1</i> | TAGTGGTACACCTATTAGTGAAAATGATTCTCCTA<br>TTTATACTAAAACCTCGATTATGTAATATGATTCATG<br>GTGCTGGCGCAGGTGCTTC    |
| HGC1-GFP-S2     | 3' primer for C-terminal tagging of <i>hgc1</i> | TAAACTAATAAATGGGGGATATGATGGATAATATA<br>AGTTATTAATTGAATGTAGGTAGGTAGGTGTAGAA<br>TCTGATATCATCGATGAATTCGAG |
| HGC1-           | internal C-terminal                             | GTATTGCTTCATCAATCTCA                                                                                   |

|                                  |                                                                        |                                                                                                         |
|----------------------------------|------------------------------------------------------------------------|---------------------------------------------------------------------------------------------------------|
| CHECK-F                          | f checking primer                                                      |                                                                                                         |
| SEC2-GFP-S1                      | 5' primer for C-terminal tagging of <i>SEC2</i>                        | ACAAACTTTAGAGATGTTAGCCGAAAATATTGATT<br>TTGATGAGAGTAGTAATGGTAATGGTAATGGTAAT<br>GGTGCTGGCGCAGGTGCTTC      |
| SEC2-GFP-S2                      | 3' primer for C-terminal tagging of <i>SEC2</i>                        | TATTGATTTGTA CTTGTACCAATCACATTTGACTTG<br>TGTATTATATAATTCAACTCAAATCACTAATCTGTC<br>TGATATCATCGATGAATTCGAG |
| XFP-REV                          | internal <i>YFP</i> and <i>GFP</i> reverse checking primer             | CCATGTGGTCTCTCTTTTCG                                                                                    |
| PRS ARG4 F<br>CHECKING<br>PRIMER | internal checking primer arg4                                          | CATCAATGGATCAGTGGCAC                                                                                    |
| PRS ARG4 R<br>CHECK              | internal reverse checking primer                                       | CATCAATGGATCAGTGGCAC                                                                                    |
| SEC2-S598A-607-YUF               | 5' primer for C terminal truncation via <i>YFP</i> tag including point | AGACAACTGGTAGATGGTAGATCAGTGCTAAGCG<br>GTGCAATTAGTTCTCCAAGACAACCAAATCTCGGT<br>GGTGGTTCTAAAGGTGAAGAATTATT |

|                    |                                                                                 |                                                                                                            |
|--------------------|---------------------------------------------------------------------------------|------------------------------------------------------------------------------------------------------------|
|                    | mutation                                                                        |                                                                                                            |
| SEC2-S600E-607-YUF | 5' primer for C terminal truncation via <i>YFP</i> tag including point mutation | AGACAACCTGGTAGATGGTAGATCAGTGCTAAGCG<br>GTAGTATTGAGTCTCCAAGACAACCAAATCTCGGT<br>GGTGGTTCTAAAGGTGAAGAATTATT   |
| SEC2-S601A-607-YUF | 5' primer for C terminal truncation via <i>YFP</i> tag including point mutation | AGACAACCTGGTAGATGGTAGATCAGTGCTAAGCG<br>GTAGTATTAGTGCTCCAAGACAACCAAATCTCGGT<br>GGTGGTTCTAAAGGTGAAGAATTATT   |
| EXO70 YUR          | 3' primer for C terminal tagging of <i>EXO70</i>                                | AATACTTAAGCCTATTTGTGTGTGTGTTACAACATT<br>ATGTGTATTTGTGACTTGTCGTCAAGAATTGACCTC<br>TAGAAGGACCACCTTTGATTG      |
| EXO70 YUF          | 5' primer for C-terminal tagging of <i>EXO70</i>                                | CACGAAAAATAAATCAAATACGTAAAGTATGAT<br>AAATTGAATTTTGAAAAGTTGTTGAACGAGAGGTT<br>AGGTGGTGGTTCTAAAGGTGAAGAATTATT |
| EXO70 CHECK        | 5' checking primer for <i>EXO70</i>                                             | GGGACTGTTACGAATTTGTC                                                                                       |
